# Supplementary material for: Fabrication of Chemofluidic Integrated Circuits by Multi-Material Printing
Source: MDPI journal article supplement (doi:10.3390/mi14030699), 2023-03-22
Supplement: s1 [file s1]

# Supplementary Information

## Fabrication of chemofluidic integrated circuits by multi-material printing

Alexander Kutscher, Paula Kalenczuk, Mohammed Shahadha, Stefan Grünzner, Franziska Obst, Denise Gruner, Georgi Paschew, Anthony Beck, Steffen Howitz and Andreas Richter

Video S1: Printing with PEG into a hole with diameter 500  $\mu\text{m}$  located in 175  $\mu\text{m}$  thick PMMA foil.

Video S2: Printing with prepolymer solution (450 drops with 550 pl each) on PMMA substrate with 600  $\mu\text{m}$  diameter engraving.

Video S3: Unrestricted fluid flow through engraving in spite of successful hydrogel actuator operation (575  $\mu\text{m}$  diameter valve seat), caused by layer misplacement.

Video S4: Free swelling of hydrogel (400 drops, 60 s exposure time) in water.

Video S5: Recorded video of the fluidic IC-program of the application chip.

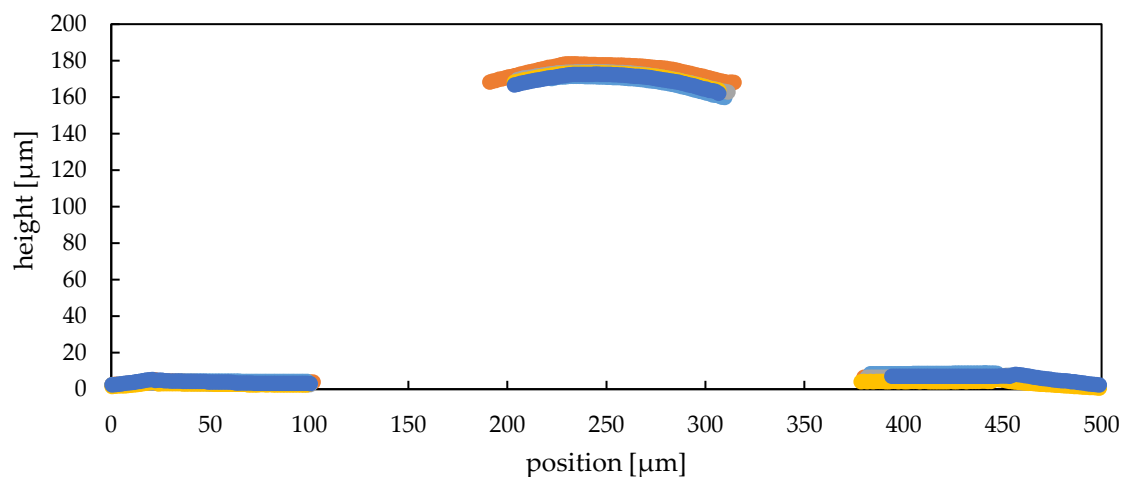

Figure S1: Line profiles of five hydrogels obtained with a confocal scanning microscope  $\mu\text{-Surf}$ . Invalid data due to the slope near the edge was removed.

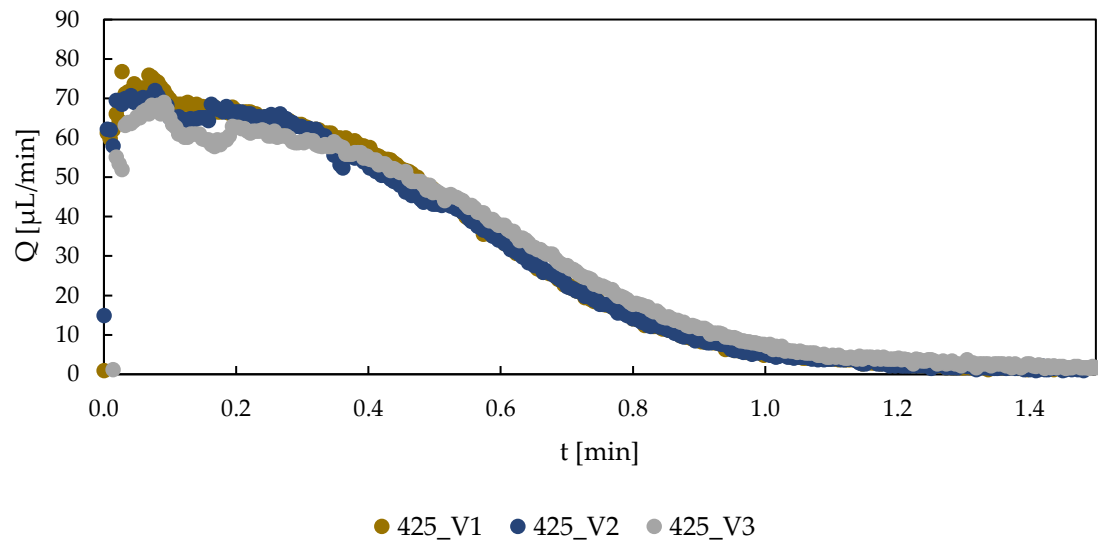

Figure S2: Closing curve diagram for three hydrogels (400 drops, 60s exposure time) in valve seats of 425  $\mu\text{m}$  diameter.
