# Supplementary material for: Fabrication of Chemofluidic Integrated Circuits by Multi-Material Printing
Source: Micromachines (Basel). 2023 Mar 22;14(3):699. doi: 10.3390/mi14030699 (PMC10052728; doi:10.3390/mi14030699)
Supplement: Supplementary file 1 [file micromachines-14-00699-s001.zip]

Archive with 6 entries (6 files):
- Supplementary Materials Files Description.pdf
- Video S1.mp4
- Video S2.mp4
- Video S3.mp4
- Video S4.mp4
- Video S5.mp4
